# Supplementary material for: Metabolomic database annotations via query of elemental compositions: Mass accuracy is insufficient even at less than 1 ppm
Source: Springer Nature journal article supplement (doi:10.1186/1471-2105-7-234), 2006-04-28
Supplement: 12859_2005_973_MOESM2_ESM.pdf [file 12859_2005_973_MOESM2_ESM.pdf]

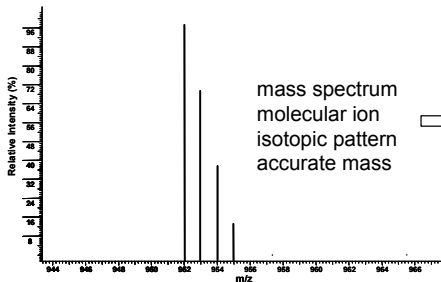

Formula  
Generator

| No. | Formula       | Mass    |
|-----|---------------|---------|
| 861 | C61H22N4OP2S2 | 952.071 |
| 862 | C61H22N4O3P2S | 952.089 |
| 863 | C61H23N4OP3S  | 952.081 |
| 864 | C61H23N4O3P3  | 952.088 |
| 865 | C61H24N4OP4   | 952.09  |
| 866 | C61H29O4PS3   | 952.097 |
| 867 | C61H30O2P2S3  | 952.088 |
| 868 | C61H31P3S3    | 952.08  |
| 869 | C61H31O2P3S2  | 952.098 |
| 870 | C61H32P4S2    | 952.09  |
| 871 | C61H119N6O    | 951.945 |
| 872 | C61H123O4S    | 951.914 |
| 873 | C61H123O6     | 951.932 |
| 874 | C61H124O2PS   | 951.906 |
| 875 | C61H124O4P    | 951.924 |
| 876 | C61H125O2P2   | 951.915 |
| 877 | C61H128P3     | 951.907 |
| 878 | C61H127N2S2   | 951.944 |
| 879 | C61H127N2O2S  | 951.962 |

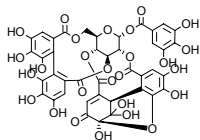

{possible result}

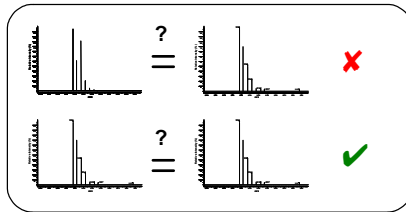

{exhaustive  
drill down}

Automatic  
Isotopic  
Pattern  
Filter

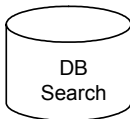

{fast approach but  
non comprehensive}

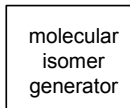

{slow approach,  
needs constraints,  
comprehensive}

| No. | Formula      | Mass    |
|-----|--------------|---------|
| 1   | C41H28O27    | 952.082 |
| 2   | C41H28N8O20  | 952.142 |
| 3   | C41H28N16O13 | 952.202 |
| 4   | C41H28N24O6  | 952.262 |
