# Supplementary material for: Metabolomic database annotations via query of elemental compositions: Mass accuracy is insufficient even at less than 1 ppm
Source: Springer Nature journal article supplement (doi:10.1186/1471-2105-7-234), 2006-04-28

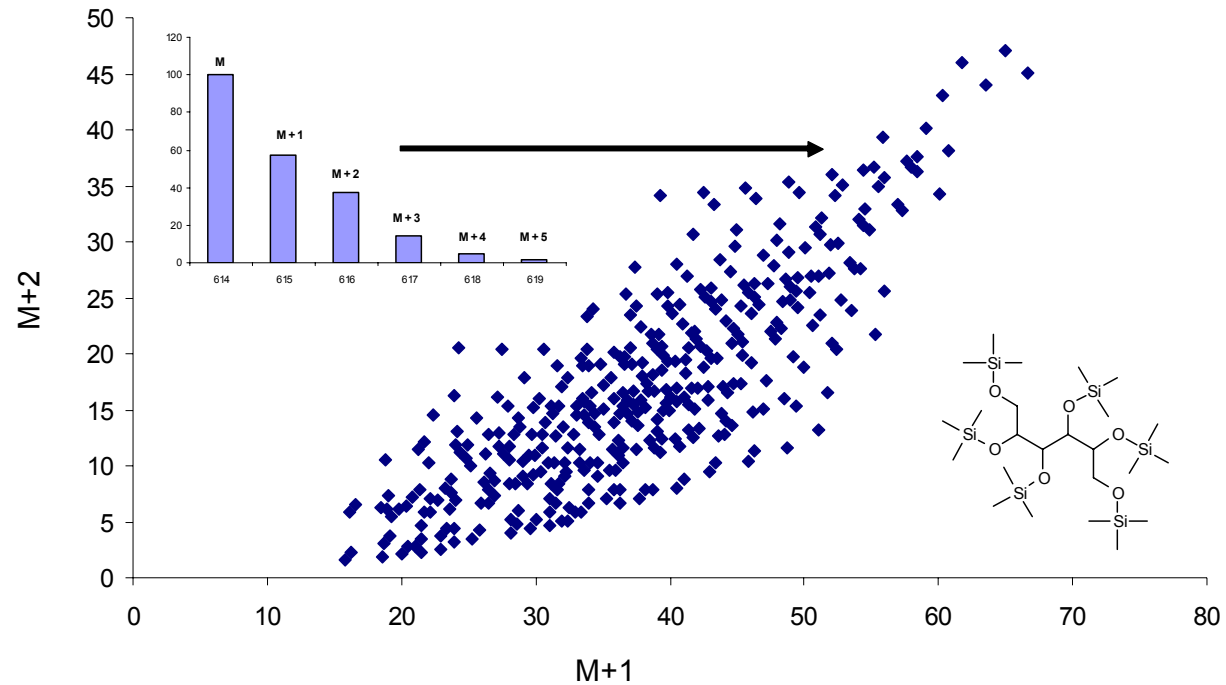

Supplement: 12859_2005_973_MOESM5_ESM.pdf [file 12859_2005_973_MOESM5_ESM.pdf]
